**Title:**

A new lineage of segmented RNA viruses infecting animals

**Authors:**

Darren J. Obbard\*<sup>1</sup>

Mang Shi<sup>2+</sup>

Katherine E. Roberts<sup>3+</sup>

Ben Longdon<sup>3+</sup>

Alice B. Dennis<sup>4+</sup>

\*Author for correspondence

+ Contributed equally

**Affiliation:**

1. Institute of Evolutionary Biology, University of Edinburgh, Charlotte Auerbach Road, Edinburgh, United Kingdom
2. Charles Perkins Center, The University of Sydney, NSW, Australia
3. Biosciences, College of Life & Environmental Sciences, University of Exeter, Penryn Campus, Penryn, Cornwall, United Kingdom
- 4 Department of Evolutionary Biology & Systematic Zoology, Institute of Biochemistry and Biology, University of Potsdam, 4476 Potsdam, Germany

**Email & ORCID:**

DJO [darren.obbard@ed.ac.uk](mailto:darren.obbard@ed.ac.uk) 0000-0001-5392-8142

ABD [alicebdennis@gmail.com](mailto:alicebdennis@gmail.com) 0000-0003-0948-9845

BL [b.longdon2@exeter.ac.uk](mailto:b.longdon2@exeter.ac.uk) 0000-0001-6936-1697

KER [K.Roberts@exeter.ac.uk](mailto:K.Roberts@exeter.ac.uk) 0000-0002-8567-3743

MS [shim23@mail.sysu.edu.au](mailto:shim23@mail.sysu.edu.au) 0000-0002-6154-4437

## Abstract

Metagenomic sequencing has revolutionised our knowledge of virus diversity, with new virus sequences being reported at a higher rate than ever before. However, virus discovery from metagenomic sequencing usually depends on detectable homology: without a sufficiently close relative, so-called ‘dark’ virus sequences remain unrecognisable. An alternative approach is to use virus-identification methods that do not depend on detecting homology, such as virus recognition by host antiviral immune mechanisms. For example, the sequencing of virus-derived small RNAs has previously been used to propose ‘dark’ virus sequences associated with the Drosophilidae (Diptera). Here we combine published *Drosophila* data with a comprehensive search of arthropod transcriptomic sequences and selected meta-transcriptomic datasets to identify a completely new lineage of segmented positive-sense single-stranded RNA viruses that we provisionally refer to as the *Quenya* viruses. Each of the five segments contains a single open reading frame, with most encoding proteins showing no detectable similarity to characterised viruses, and one sharing a small number of key residues with the RNA-dependent RNA polymerases of single- and double-stranded RNA viruses. Using these sequences, we identify close relatives in approximately 20 arthropods, including insects, crustaceans, spiders and a myriapod. Using a more conserved sequence from the putative polymerase, we further identify relatives in meta-transcriptomic datasets from gut, gill, and lung tissues of vertebrates, reflecting infections of vertebrates or of their associated parasites. Our data illustrate the utility of small RNAs to detect viruses with limited sequence conservation, and provide robust evidence for a new deeply divergent and phylogenetically distinct RNA virus lineage.

## Key Words

Metagenome, RNA virus, dark virus, arthropod, RNA interference

## 1 Introduction

Initially pioneered by studies of oceanic phage (Breitbart et al. 2002), since the mid-2000s an ever-increasing number of metagenomic studies have identified thousands of new viruses (or virus-like sequences) associated with bacteria, plants, animals, fungi, and single-celled eukaryotes (reviewed in Greninger 2018, Obbard 2018, Shi et al. 2018, Zhang et al. 2018). At the same time, routine high-throughput sequencing has provided a rich resource for virus discovery among eukaryotic host genomes and transcriptomes (e.g. Bekal et al. 2011, Longdon et al. 2015, Webster et al. 2015, François et al. 2016, Mushegian et al. 2016, Gilbert et al. 2019). Indeed, a recent survey suggested that, as of 2018, around 10% of the available picornavirus-like polymerase sequences exist only as un-annotated transcripts within the transcriptomes of their hosts (Obbard 2018). Together, these two sources of (meta-)genomic data have ‘filled in’ the tree of viruses at many levels. They have expanded the host range of known viruses (e.g.

Galbraith et al. 2018), identified vast numbers of likely new species and genera—consequently provoking considerable debate on how we should go about virus taxonomy (Simmonds et al. 2017, King et al. 2018, Simmonds and Aiewsakun 2018)—and identified new lineages that may warrant recognition at family level, including Chuviruses, Yueviruses, Qinviruses, Zhaoviruses, Yanviruses and Weiviruses (Li et al. 2015, Shi et al. 2016). Perhaps even more importantly, these discoveries have also started to impact our understanding of virus evolution, emphasising the importance of ‘modular’ exchange (Koonin et al. 2015, Dolja and Koonin 2018) and suggesting surprisingly long-term fidelity to host lineages, at least at higher taxonomic levels (Geoghegan et al. 2017, Shi et al. 2018).

Nevertheless, despite the successes of metagenomic virus discovery, there are clear limitations to the approach. First, ‘virus-like sequences’ identified from a putative host need not equate to an active viral infection of that

species. They may instead represent integrations into the host genome, infections of cellular parasites or other microbiota, infections of gut contents, or simply contaminating nucleic acid (reviewed in Obbard 2018). Second, most metagenomic methods rely on sequence similarity searches to identify virus sequences through inferred homology. This necessarily limits the new viruses that can be discovered to the relatives of known viruses. In the future, as similarity search algorithms become more sensitive (e.g. Kuchibhatla et al. 2014, Yutin et al. 2018), this approach may be able to uncover all viruses—at least those that do have common ancestry with the references. However, this approach will almost certainly continue to struggle to identify less conserved parts of the genome, especially for segmented viruses and incomplete assemblies. As a consequence, there may be many viruses and virus fragments that cannot be seen through the lens of homology-based metagenomics, the so-called ‘dark’ viruses (Rinke et al. 2013, Krishnamurthy and Wang 2017, Knox et al. 2018).

The ultimate solution to any shortcomings of metagenomic discovery is to isolate and experimentally characterise viruses. However, the sheer number of uncharacterised virus-like sequences means that this is unlikely to be an option in the foreseeable future. Instead, we can use other aspects of metagenomic data to corroborate evidence of a viral infection (reviewed in Obbard 2018). For example, metagenomic reads are more consistent with an active infection if RNA is very abundant (several percent of the total), if strand biases reflect active replication (such as the presence of the coding strand for negative sense RNA viruses or DNA viruses), or if RNA virus sequences are not present as DNA. The presence and absence of contigs across datasets can also provide useful clues as to the origin of a sequence. Specifically, sequences that are present in all individuals or in all populations are more likely to represent genome integrations, sequences that always co-occur with recognisable viral fragments may be segments that are not identifiable by homology, and sequences that co-occur with non-host sequences are good candidates to be viruses of the

microbiota.

One of the most powerful ways to identify viruses is to capitalise on the host’s own ability to recognise pathogens, for example by sequencing the copious virus-derived small RNAs generated by the antiviral RNAi responses of plants, fungi, nematodes and arthropods (Aguilar et al. 2015, Webster et al. 2015). This not only demonstrates host recognition of the sequences as viral in origin, but also (if both strands of ssRNA viruses are present) demonstrates viral replication, and can even identify the true host of the virus based on the length distribution and base composition of the small RNAs (compare Webster et al. 2016, with Coyle et al. 2018).

Using ribosome-depleted RNA and small-RNA metagenomic sequencing, Webster *et al* (2015) previously proposed approximately 60 ‘dark’ virus sequences associated with *Drosophila*. These comprised contigs of at least one kbp that were present as RNA but not DNA, contained a long open reading frame, lacked identifiable homology with known viruses or cellular organisms, and were substantial sources of the 21nt small RNAs that characterise antiviral RNAi in *Drosophila*. They included ‘Galbut virus’ (KP714100, KP714099), which has since been shown to constitute two divergent segments of an insect-infecting Partitivirus (KP757930; Shi et al. 2018) and is the most common virus associated with *Drosophila melanogaster* in the wild (Webster et al. 2015); ‘Chaq virus’ (KP714088), which may be a satellite or an optional segment of Galbut virus (Shi et al. 2018); and 56 unnamed ‘dark’ virus fragments (KP757937-KP757993). Subsequent discoveries have since allowed 26 of these previously dark sequences to be identified as segments or fragments of viruses that do display detectable homology in other regions, including several pieces of Flavi-like and Ifla-like viruses (Shi et al. 2016, Shi et al. 2016) and the missing segments of a Phasmavirus (Matthew J. Ballinger, pers. com.) and Torrey Pines reovirus (Shi et al. 2018).

Here we combine data from Webster *et al* (2015) with a search of transcriptome assemblies and selected meta-transcriptomic datasets to identify six of the remaining ‘dark’ *Drosophila*

virus sequences as segments of the founding members of a new lineage of segmented positive-sense single-stranded (+ss)RNA viruses. The protein encoded by segment 5 of these viruses shares a small number of conserved residues with the RNA dependent RNA polymerases of Picornaviruses, Flaviviruses, Permutotetraviruses, Reoviruses, Totiviruses and Picobirnaviruses, but is not substantially more similar or robustly supported as sister to any of these lineages—suggesting that the new lineage may warrant recognition as a new family. We find at least one homologous segment in publicly-available transcriptomic data from each of 36 different animal species, including multiple arthropods and a small number of vertebrates, suggesting these viruses are associated with a diverse group of animal taxa.

## 2 Methods

### 2.1 Association of ‘dark’ virus segments from *Drosophila*

Webster *et al* (2015) previously performed metagenomic virus discovery by RNA sequencing from a large pool of wild-collected adult *Drosophila* (Drosophilidae; Diptera). In brief, ca. 5000 flies were collected in 2010 from Kenya (denoted pools E and K), the USA (pool I), and the UK (pools S and T). Ribosome depleted and double-stranded nuclease normalised libraries were sequenced using the Illumina platform, and assembled using Trinity (Grabherr *et al.* 2011). Small RNAs were sequenced from the same RNA pools, and the characteristic Dicer-mediated viral small-RNA signature used to identify around 60 putative ‘dark’ virus sequences that lacked detectable sequence homology (Supporting Figures S1 and S2; sequences accessions KP757937-KP757993). Raw data are available under NCBI project accession PRJNA277921. For details, see Webster *et al* (2015).

Here we took four approaches to identify sequences related to these ‘dark’ viruses of *Drosophila*, and to associate ‘dark’ fragments into viral genomes based on the co-occurrence of homologous sequences in other taxa. First, we obtained the collated transcriptome shotgun as-

semblies available from the European Nucleotide Archive (<ftp://ftp.ebi.ac.uk/pub/databases/ena/tsa/public/>) and inferred their protein sequences for similarity searching by translating the long open reading frames present in each contig. We used these to build a database for Diamond (Buchfink *et al.* 2014), and used Diamond ‘blastp’ to search the database with the translated ‘dark’ virus sequences identified from *Drosophila*. Second, we downloaded the pre-built tsa\_nt BLAST database provided by NCBI (<ftp://ftp.ncbi.nlm.nih.gov/blast/db/>), and used tblastn (Camacho *et al.* 2009) to search this database for co-occurring homologous fragments with the same sequences. Third, we used diamond ‘blastx’ (Buchfink *et al.* 2014) to search large-scale metagenomic assemblies derived from various invertebrates (Shi *et al.* 2016) and vertebrates (Shi *et al.* 2018). For sources of raw data see Supporting File S1. Fourth, to identify missing fragments associated with *Drosophila*, we also re-queried translations of the raw unannotated meta-transcriptomic assemblies of Webster *et al* (2015) (<https://doi.org/10.1371/journal.pbio.1002210.s002>) using blastp (Camacho *et al.* 2009). Fragments with homologous sequences that consistently co-occurred across multiple transcriptomic datasets were taken forward as candidate segments of new viruses.

### 2.2 Identification of related viral segments from *Lysiphlebus fabarum*

Transcriptomic data were collected from adults and larvae of the parasitoid wasp *Lysiphlebus fabarum* (Braconidae; Hymenoptera) as part of an experimental evolution study (Dennis *et al.* 2017, Dennis *et al.* In Revision). Briefly, parasitoids were reared in different sublines of the aphid *Aphis fabae*, each either possessing different strains of the defensive symbiotic bacterium *Hamiltonella defensa*, or no *H. defensa*. Aphid hosts were reared on broad bean plants (*Vicia faba*) and parasitoids were collected after 11 (adults) or 14 (larvae) generations of experimental selection. Poly-A enriched cDNA libraries were constructed using the Illumina TruSeq RNA kit (adults) or the Illumina TruSeq Stranded mRNA kit (larvae). Libraries were sequenced in

single-end, 100bp cycles on an Illumina HiSeq2500 (sequence data available under NCBI PRJNA290156). Trimmed and quality filtered reads were assembled *de novo* using Trinity (v2.4.0, for details see Dennis et al. In Revision), read-counts were quantified by mapping to the reference using Bowtie2 (Langmead and Salzberg 2012), and uniquely-mapping read counts were extracted with eXpress (Roberts and Pachter 2012). To assign taxonomic origin, the assembled *L. fabarum* transcripts were used to query the NCBI *nr* protein blast database (blastn, e-values < 10<sup>-10</sup>). The subsequent differential expression analysis identified several highly expressed fragments that were not present in the *L. fabarum* draft genome nor in transcripts from the host aphid (*A. fabae*), and were not identified in the whole-transcriptome annotation using *blastn*. Subsequent protein-level searches (blastp, E-values < 10<sup>-10</sup>) revealed sequence similarity in four of the fragments to putative 'dark' virus sequences from *Drosophila* (Dennis et al. In Revision). Here we used read counts to confirm the co-occurrence of homologous fragments across *L. fabarum* individuals, and to identify a fifth viral segment (not previously detected on the basis of the original small RNA profile in *Drosophila*) on the basis of its co-occurrence across samples. To generate a complete viral genome, we selected a high-abundance larval dataset (ABD-118-118, SRA sample SAMN10024157, project PRJNA290156), and subsampled the reads by 10 thousand-fold for re-assembly with Trinity (Grabherr et al. 2011).

### **2.3 Determination of the genomic strand from a related virus of Lepidoptera**

Strand-specific RNA libraries can be used to identify strand-biases in viral RNA, providing a clue as to the likely genomic strand of the virus and evidence for replication. Specifically, because mRNA-like expression products are present in addition to genomic reads, positive sense single-stranded (+ssRNA) viruses tend to be very strongly biased to positive sense reads, replicating double-stranded (dsRNA) viruses are weakly biased toward positive-sense reads, and replicating negative sense (-ssRNA) viruses are weakly biased toward negative sense reads. This

is because mRNA-like expression products of replicating viruses have an abundance approaching that of the genomic strand. Unfortunately, much RNA sequencing is strand-agnostic (including that from the *Drosophila* datasets of Webster *et al* (2015)) and the vast majority of Eukaryotic transcriptomic datasets are sequenced from poly-A enriched RNA (such as that from *Lysiphlebus fabarum*), which artificially enriches for polyadenylated RNAs such as mRNA-like expression products. We therefore sought relatives in a strand-specific meta-transcriptomic dataset that had been prepared without poly-A enrichment.

For this purpose, we used a metagenomic dataset prepared as part of an ongoing study of British Lepidoptera (Longdon & Obbard, unpublished). Briefly, between one and twelve adults (total of 45) of each of 16 different species were collected from Penryn (Cornwall, UK) and Buckfastleigh (Devon,UK) in July and September 2017 respectively. Total RNA was extracted from each individual using Trizol-Chloroform extractions according to the manufacturer's instructions, and a strand-specific library prepared from the combined pool using an Illumina TruSeq stranded total RNA kit treating samples with Gold rRNA removal mix. This was sequenced by the Exeter University Sequencing service using the Illumina platform. The reads were assembled *de novo* using Trinity (Grabherr et al. 2011), and the resulting assemblies searched as protein using Diamond 'blastp' (Buchfink et al. 2014).

We then used an RT-PCR screen to confirm the identity of the host, and to confirm that the 5 putative segments co-occurred in the same individual. RNA was reverse-transcribed using GoScript reverse transcriptase (Promega) with random hexamer primers, then diluted 1:10 with nuclease free water. PCRs to amplify short regions from the five viral segments (S1-S5) were carried out with the following primers: S1F ATGCATCTCGTTCCTGACCA and S1R GCCCTTCAGACAGCTCTAA; S2F CACCACCAAGAACGGACAAG and S2R TGCCACCACTTAAC-CACAT; S3F AGCAATTCAACGACCACACC and S3R

GATAGGGGACAGGGCAGATC; S4F ATGAACGA-GAGGTGCCTTCA and S4R CTCCATCACCTT-GACATGCG; S5F TGCACTGTTTCAGCTACCTCA and S5R CCGTGTCTCGTTCGATGAAGTC, using a touch down PCR cycle (95°C 30 sec, 62°C (-1°C per cycle) 30 sec, 72°C 1 min; for 10x cycles followed by; 95°C 30 sec, 52°C 30 sec, 72°C 1 min; for a further 30x cycles). As a positive control for RT we used host Cytochrome Oxidase I amplified with LCO/HCO primers (Folmer et al. 1994) (94°C 30 sec, 46°C 1 min, 72°C 1 min; for 5x cycles followed by; 94°C 30 sec, 50°C 1min, 72°C 1 min; for a further 35x cycles). All PCR reactions were carried out in duplicate using Taq DNA Polymerase and ThermoPol Buffer (New England Biolabs). We used (RT negative) PCR to confirm that none of these segments were present as DNA. To confirm the identity of the resulting PCR products, positive samples were Sanger sequenced from the reverse primer using BigDye (Applied Biosystems) after treatment with exonuclease I and shrimp alkaline phosphatase.

#### **2.4 Inference of protein domain homology**

Searches using blastp had previously been unable to detect homology between the putative 'dark' virus sequences of *Drosophila* and known proteins (Webster et al. 2015). However, more sophisticated Hidden Markov Model approaches to similarity searching that use position-specific scoring matrix (PSSM) profiles are known to be more sensitive (Kuchibhatla et al. 2014). We therefore aligned the putative viral proteins from *Drosophila* with their homologs from other transcriptomic datasets using muscle (Edgar 2004), and used these alignments to query PDB, Pfam-A (v.32), NCBI Conserved Domain (v.3.16) and TIGRFAMs (v.15.0) databases using HHpred (Zimmermann et al. 2018).

#### **2.5 Phylogenetic analysis**

To infer relationships among the new viruses, we aligned protein sequences using Mcoffee from the T-coffee package (Wallace et al. 2006), and inferred relationships by maximum likelihood using PhyML (Guindon et al. 2010). For each of the segments available from *Drosophila*, *L. fabarum*, *Lepidoptera*, and the other species, between 11 (Segment 2) and 36 (Segment 5) protein sequences were aligned, depending on

level of sequence conservation. Regions of low conservation at either end of the alignments were selected by eye and removed. However, but no internal regions were trimmed, as trimming leads to bias toward the guide tree and gives false confidence (Tan et al. 2015). The end-trimmed alignments were then used to infer phylogenetic relationships for each of the segments using the LG protein substitution matrix (Le and Gascuel 2008) with inferred residue frequencies and a 5-category discretised gamma distribution of rates. The preferred tree was the one with the maximum likelihood after both nearest-neighbour interchange (NNI) and tree-bisection and reconnection (TBR) searches.

To illustrate the relative distance (and likely unresolvable relationships) between the new viruses and previously described virus families, we selected for phylogenetic analysis the RNA dependent RNA polymerase (RdRp) sequences from representatives of related clades identified using HHpred (i.e. the Flaviviruses, Caliciviruses, Picornaviruses, Permutotetraviruses, Reoviruses and Picobirnaviruses). We aligned a core RdRp sequence of 250-400 residues with the new virus sequences, using two different methods. First, using M-coffee as above (Wallace et al. 2006), which reports a consensus alignment of multiple methods, second using Espresso (Armougom et al. 2006), which uses structural data to inform the alignment. Each of these alignments was used to infer the phylogenetic relationship of these clades by maximum likelihood, using Phyml as described above (Guindon et al. 2010). As before, alignment ends were trimmed by eye (Tan et al. 2015). To examine the consequences of conditioning on a specific alignment, we also inferred sequence relationships using BALi-Phy (Redelings 2014). BALi-Phy uses a Bayesian MCMC sampler to jointly infer the alignment, the tree, and the substitution and indel model parameters. Although computationally expensive (a total of ca. 3700 Xeon X5650 2.67GHz CPU hours), this captures some of the uncertainty inherent in inferring homology during alignment, and empirically BALi-Phy performs well with highly divergent sequences (Nute et al. 2018). We ran 10 simultaneous instances of BALi-Phy, analysing the combined

output after the effective sample size for each parameter (including the topological ESS) was in excess of 3000 and the potential scale reduction factor each parameter less than 1.01.

### 3 Results

#### 3.1 Four segments of a 'dark' virus associated with *Drosophila* and other arthropods

We hypothesised that although the putative 'dark' virus fragments proposed by Webster *et al* (2015) on the basis of small-RNA profiles (Supporting Figures S1 and S2) lacked detectable homology with known viruses, their relatives may be present—but unrecognised—in transcriptome assemblies from other species. If so, we reasoned that the co-occurrence of homologous sequences across different datasets could allow fragments from *Drosophila* to be associated into complete virus genomes. Using similarity searches we initially identified six fragments from Webster *et al* (2015) that each consistently identified homologs in several distantly related transcriptomic datasets; those of the centipede *Lithobius forficatus* (transcriptome GBKE; NCBI project PRJNA198080 (Rehm *et al.* 2014)), the locust *Locusta migratoria manilensis* (GDIO; PRJNA283919 (Zhang *et al.* 2015)), the leafhopper *Clastoptera arizonana* (GEDC; PRJNA303152 (Tassone *et al.* 2017)), the hematophagous bug *Triatoma infestans* (GFMC; PRJNA304741 (Traverso *et al.* 2017)), and two parasitoid wasps, *Ceraphron* spp. (GBVD; PRJNA252127 (Peters *et al.* 2017)) and *Psytalia concolor* (GCDX; PRJNA262710). Motivated by this discovery of four homologous sequence groups across these taxa, we performed a new search of the Webster *et al* (2015) data that identified two additional fragments. The eight *Drosophila*-associated sequences formed two groups (four sequences from drosophilid pool E and four from drosophilid pool I) encoding proteins that ranged between 40% and 60% amino acid identity (See supporting File S1 for accession numbers). The two most highly conserved *Drosophila*-associated sequences also identified homologs in 10 other arthropod transcriptomes, including six from Hymenoptera, two from Hemiptera, and one each from Coleoptera, Lepidoptera and Odonata (Supporting File S1).

Although none of the protein sequences from these fragments displayed significant blastp similarity to characterised proteins, the presence of the four clear homologs in eight unrelated arthropod transcriptomes strongly supported an association between them. In addition, the similar length and similar coding structure of the fragments across species suggested that they comprise the genomic sequences of a segmented virus (all between 1.5 and 1.7 kbp, encoding a single open reading frame; Figure 1). Finally, as expected for viruses of *Drosophila*, all segments were sources of 21nt small RNAs from along the length of both strands of the virus, demonstrating that the virus is recognised as a double-stranded target by Dicer-2 (Supporting Figures S1 and S2). We therefore speculatively named these putative viruses from drosophilid pools E and I as 'Kwi virus' and 'Nai virus' respectively, and submitted them to GenBank (KY634875-KY634878; KY634871-KY634874; mentioned in Obbard 2018). Provisional names were chosen following the precedent set by *Drosophila* 'Nora' virus (*new* in Armenian (Habayeb *et al.* 2006)) and 'Galbūt' virus (*maybe* in Lithuanian (Webster *et al.* 2015)), with *Kwí* and *Nai* being indicators of uncertainty (*maybe, perhaps*) in JRR Tolkien's invented language Quenya (Wickmark 2019).

#### 3.2 A related hymenopteran virus identifies a fifth segment

In an unrelated expression study of the parasitoid wasp *Lysiphlebus fabarum*, Dennis *et al* (In Revision) identified four sequences showing clear 1:1 homology with the segments of Kwi virus and Nai virus. These were again *ca.* 1.5kb in length, and each encoded a single open reading frame (Figure 1). Each segment had a poly-A tract at the 3' end, suggesting either that the virus has poly-adenylated genome segments, or that these represent poly-adenylated mRNA-like expression products. Strongly consistent with a viral origin, the sequences were present in some individuals but not others (Supporting Figure S3), always co-occurred with correlated read numbers (correlation coefficient >0.87; Supporting Figure S3C), and could be extremely abun-

dant—accounting for up to 40% of non-ribosomal reads and equating to 1 million-fold coverage of the virus in some wasps (Figure 1).

Based on the high abundance and the clear pattern of co-occurrence, we searched for other wasp-associated contigs displaying the same properties, reasoning that these were likely to be additional segments of the same virus. This search identified a candidate 5<sup>th</sup> segment of ca. 2kbp, again encoding a single open reading frame (Figure 1). We then sought homologs of this 5<sup>th</sup> segment in the data of Webster *et al* (2015) and in the public transcriptomic datasets outlined above. As expected, we were able to find a homolog in every case, confirming co-occurrence of the five putative viral segments across datasets (Figure 1; supporting File S1; Nai virus NCBI accession MH937729, Kwi virus MH937728). The protein encoded by the newly-identified segment 5 was substantially more conserved than the other proteins, with 64% amino-acid identity between Kwi virus and Nai virus. We believe that it had most likely been missed from the putative ‘dark’ viruses of Webster *et al* (2015) because of the relatively small number of reads present in that dataset (10-100 fold coverage; Figure 1). Based on these segments, we used a re-assembly of a single down-sampled larval *Lysiphlebus fabarum* dataset (sample ABD-118; Supporting Figure 3) to provide an improved assembly, which we provisionally named ‘Sina Virus’, reflecting our increased confidence that the sequences are viral in origin (*Sina* is Quenya for *known, certain, ascertained*) and submitted the sequences to Genbank under accession numbers MN264686-MN264690.

### **3.3 A related Lepidopteran virus suggests +ssRNA as the genomic material**

To determine whether these virus genomes are likely to be double-stranded RNA (dsRNA), positive sense single stranded (+ssRNA) or negative sense single-stranded (-ssRNA), we identified a related virus in a strand-specific metatranscriptomic dataset that had been prepared without poly-A enrichment from several species of Lepidoptera (Longdon & Obbard, unpublished). All 5 segments were detected (Figure 1), and as was the case for Kwi, Nai, and Sina

viruses, segments 1-4 were around 1.6kbp and segment 5 around 2kbp in length, each encoding a single open reading frame (Figure 1). We have provisionally named these sequences as ‘Nete virus’ (*Netë* is Quenya for *another one, one more*) and submitted them to GenBank under accession numbers MN264681-MN264685.

Overall, this virus accounted for 3% of the reads in the metagenomic pool, giving around 10 thousand-fold coverage of the genome (Figure 1). A RT-PCR survey of the individual moth RNA extractions used to create the metagenomic pool showed that all five segments co-occur in a single *Crocallis elinguaris* individual (Geometridae; Lepidoptera), collected at latitude 50.169, longitude -5.125 on 23/Jul/2017. RT-negative PCR showed that viral segments were not present in a DNA form. An analysis of the strand bias in the metagenomic sequencing found that 99.8% of reads derived from the positive-sense (coding) strand, strongly suggesting that this virus has a +ssRNA genome (Supporting File S2).

### **3.4 Related viruses are present in metagenomic datasets from other animals**

After identifying the complete (five segment) virus genomes in transcriptomic datasets from 10 different arthropods, and incomplete genomes (between one and four segments) in a further 11 arthropod datasets (Supporting File S1), we sought to capitalise on recent metagenomic datasets to identify related sequences in other animals (Shi *et al.* 2016, Shi *et al.* 2018). This search yielded complete (or near-complete) homologs of segment 5 (the most conserved protein) in 18 further datasets, including four from mixed pools of insects, two from spiders, three from crustaceans, seven from bony fish, and one each from a toad (*Bufo gargarizans*) and a lizard (*Crotalus scorpions*). Five of these pools also contained homologs of segment 1 (the second most conserved protein), and one also contained segment 4 (the third most conserved protein). These sequences will be submitted to Genbank on or before acceptance of this manuscript under accession identifiers MNXXXXXX-MNXXXXXX; See Supporting File S1 for details.

The finding that these virus sequences can be as-



sociated with both vertebrates and invertebrates may indicate that they are broadly distributed across the metazoa (none were identified in association with plant or fungal transcriptomes). However, metagenomic data alone cannot confirm this, as such datasets can include contamination from gut contents or parasites of the supposed host taxon. We therefore explored three sources of evidence that could be used to corroborate the targeted taxon as the true host. First, we examined the viral read abundance, as very high abundance is unlikely for viruses of contaminating organisms. Abundance ranged from over 37,124 Reads Per Kilobase per Million reads (40% of non-ribosomal RNA) for Sina virus in one *Lysiphlebus fabarum* sample, to 0.3 RPKM (a single read-pair) for the transcriptome of *Epiophlebia superstes*, with a median of 16.9 RPKM (Supporting File S1). This strongly supports some of the arthropods (such as *Lysiphlebus*) as true hosts, but does not support or refute that the virus may infect vertebrates (e.g. RPKM as high as 834 for one Scorpaeniformes fish sample, but as low as 4.6 in *Drosophila* Nai virus, where infection could be independently confirmed by the presence of 21nt viral small RNAs). Second, for Segment 5 (which was available for most taxa) we examined the deviation in dinucleotide composition from that expected on the basis of the base composition, as this is reported to be predictive of host lineages (Kapoor et al. 2010, but see Di Giallonardo et al. 2017). However, we were unable to detect any clear pattern among viruses, either by inspection of a PCA, or using a linear discriminant function analysis. This may support a homogenous pool of true hosts, such as arthropods but not vertebrates, but the short sequence length available (<2kbp) and small sample size (32 sequences) means that such an analysis probably lacks power.

Finally, we also analysed the phylogenetic relationships for all of the segments, as (except for vectored viruses) transitions between vertebrate and invertebrate hosts are generally rare (Longdon et al. 2015, Geoghegan et al. 2017). This showed the sequences from the toad (*Bufo gargarizans*) and the lizard (*Calotes versicolor*) both sit among arthropod samples (segments 1

and 5; Figure 2E), as do the several other sequences from fish, supporting the idea that those viruses most likely represent contaminating invertebrates in the vertebrate datasets. However, the analysis also identified a deeply divergent clade of four sequences from bony fish with no close relatives in invertebrates that, if not contamination, could in principle represent a clade of vertebrate-infecting viruses (Figure 2E). Accession numbers, alignments and tree files are provided in Supporting file S3.

### **3.5 Segment 5 has similarity to viral RNA dependent RNA polymerases**

Having identified 1:1 homologs in multiple datasets, we were able to use the aligned protein sequences to perform a more sensitive homology search for conserved protein motifs using HHpred (Zimmermann et al. 2018). This still identified no significant similarity in the proteins encoded by segments 2-4 (E-value >1), and only a weakly-supported *ca.* 110 amino acid region of the segment 1 alignment with 0.051 similarity to bacterial tRNA methyltransferases (E-value = 0.0019; see Supporting File S4). However, in contrast to searches using blastp, the alignment of segment 5 displayed a more strongly supported *ca.* 300 amino acid region with an overall similarity of 0.127 to the RNA dependent RNA polymerase Norwalk virus (E-value =  $2.2 \times 10^{-33}$ ; see Supporting File S4). This sequence was approximately equally matched to around 25 different reference structure or motifs, including RdRps from both +ssRNA viruses such as Picornavirales, Flavi-like viruses, and Permutotetraviruses, and dsRNA viruses such as Reoviruses, Picobirnaviruses, and Totiviruses. Notably, this region of similarity included a very highly conserved GDD motif that is shared by many viral polymerases, supporting the idea that segment 5 encodes the viral polymerase.

### **3.6 'Quenyaviruses' are highly divergent and may constitute a new family**

The new virus lineage described here has a distinctive genome structure comprising four 1.6kbp +ssRNA segments each encoding a single protein of unknown function, and one 2kbp +ssRNA segment encoding an RdRp. The putative RdRp is substantially divergent from those

of characterised +ssRNA and dsRNA virus families, to the extent that similarity cannot be detected using routine blastp. On this basis we propose the informal name ‘Quenyaviruses’, reflecting the naming of the four founding members, and suggest that they may warrant consideration as a new unplaced family.

To explore their relationships with other RNA viruses using an explicit phylogenetic analysis, we selected a region of 250–400 amino acid residues of the core RdRp region from 12 representative Quenyaviruses and 83 members of the related lineages identified by HHpred. Phylogenetic inference is necessarily challenging with such high levels of divergence (mean pairwise protein identity of only 9%) and the inferred relationships among such distantly-related lineages are unlikely to be reliable (Bhardwaj et al. 2012, Nute et al. 2018). In particular, although current phylogenetic methods perform surprisingly well on simulated data with identities as low 8–10%, this is only true when homology is known (i.e. the true alignment is available; Bhardwaj et al. 2012). When the alignment has to be inferred, performance is poor—even though the true substitution model is the one being modelled (Nute et al. 2018). We therefore compared between trees that conditioned on each of two different alignment methods (Espresso, Mcoffee), and also co-inferred the tree and the alignment using BALi-Phy (Redelings 2014). Accession numbers, alignments and tree files are provided in Supporting File S3.

All methods found the Quenyavirus RdRps to form a monophyletic clade, supporting their treatment as a natural group. The two ML trees placed the Quenyaviruses closer to (some of) the Reo-like viruses than to others, while the Bayesian analysis placed the Quenyaviruses closest to a (non-monophyletic) group of picorna-like viruses (Figure 3A and B). However, none of the methods recovered all viral clades as monophyletic, and there was no consistency in the placement of the clades relative to each other. Moreover, the Bayesian joint alignment/tree analysis gave almost no posterior support to any of the major clades (Figure 3C;

Supporting File S3), suggesting that the relationships among these lineages cannot be robustly inferred. Nevertheless, this uncertainty in the placement of the Quenyaviruses emphasises their deep divergence from other taxonomically-recognised virus clades.

## 4. Discussion

Here we report the discovery of the Quenyaviruses, a new clade of segmented +ssRNA viruses identifiable from multiple (meta-)transcriptomic datasets, primarily of arthropods. Four of these segments had initially been identified as ‘dark’ viruses of *Drosophila*, purely on the basis of the characteristic small-RNA signature resulting from antiviral RNAi (Webster et al. 2015). Now, by identifying a fifth segment encoding a divergent RdRp, we show that they form a monophyletic clade that is only distantly related to other +ssRNA viruses, and cannot robustly be placed within a wider phylogeny.

As with other metagenomic studies of virus diversity, this work raises two important questions. First, how well have we truly sampled the virosphere? Metagenomic studies often contain sequences lacking detectable homology, and it has been suggested that these include many ‘dark’ viruses (Krishnamurthy and Wang 2017). This may imply that many deeply-divergent viruses, or viruses lacking common ancestry with known families, remain to be discovered. Alternatively, many of the ‘dark’ sequences may be the less-conserved fragments of otherwise easily-recognised virus lineages (e.g. François et al. 2018). Thus far, of the predicted ‘dark’ *Drosophila* virus sequences of Webster *et al* (2015) 46% remain dark, 44% are now recognisable as members of known virus lineages, and 10% represent a genuinely new divergent lineage (the Quenyaviruses)—albeit one in which a sensitive search can identify some evidence of homology. Second, how many viruses are hiding in plain sight? Perhaps 10% of polymerase sequences from Picornavirales are currently unannotated as such within transcriptomic datasets (Obbard 2018), and surveys of publicly available data often identify multiple new viruses (e.g. François et al. 2016, Gilbert et al. 2019). Some of sequences we analyse here have been in the public domain for

more than 7 years, but without routine screening and annotation (or submission of such sequences to databases) they not only remain unavailable for analysis, but also potentially 'contaminate' other analyses with misattributed taxonomic information. Finally, our work also emphasises the ease with which new viruses can be identified. relative to the investment required to understand their biology. The Quenyaviruses seem broadly distributed, if not common, but we have no knowledge at all of their host range, transmission routes, tissue tropisms, or pathology.

## Acknowledgements

We thank Christoph Vorburger for facilitating the re-use of data from *Lysiphlebus*, and of all

the many researchers who provided their data to publicly available databases.

## Funding

Metagenomic sequencing of Drosophilidae was funded by a Wellcome Trust Research Career Development Fellowship to DJO (WT085064; <http://www.wellcome.ac.uk/>). Metagenomic sequencing of Lepidoptera was funded by a Sir Henry Dale Fellowship to BL, jointly funded by the Wellcome Trust and the Royal Society (Grant Number 109356/Z/15/Z <http://www.wellcome.ac.uk/>). Work on *Lysiphlebus* was funded through SNSF Professorship nr. PP00P3\_146341 and Sinergia grant nr. CRSII3\_154396 to Prof. Christoph Vorburger.

## Figures & Legends

**Figure 1: Virus segments and sequencing coverage**

Panels show the structure and fold-coverage for each of the five segments (columns), for each of the four viruses (rows). Graphs represent fold-coverage on a log<sub>10</sub> scale, with the structure of the segment annotated below to scale (dark: coding, pale: non-coding). Assembled contigs that terminated with a poly-A tract are denoted 'AA', and potentially incomplete open reading frames indicated with a jagged edge.

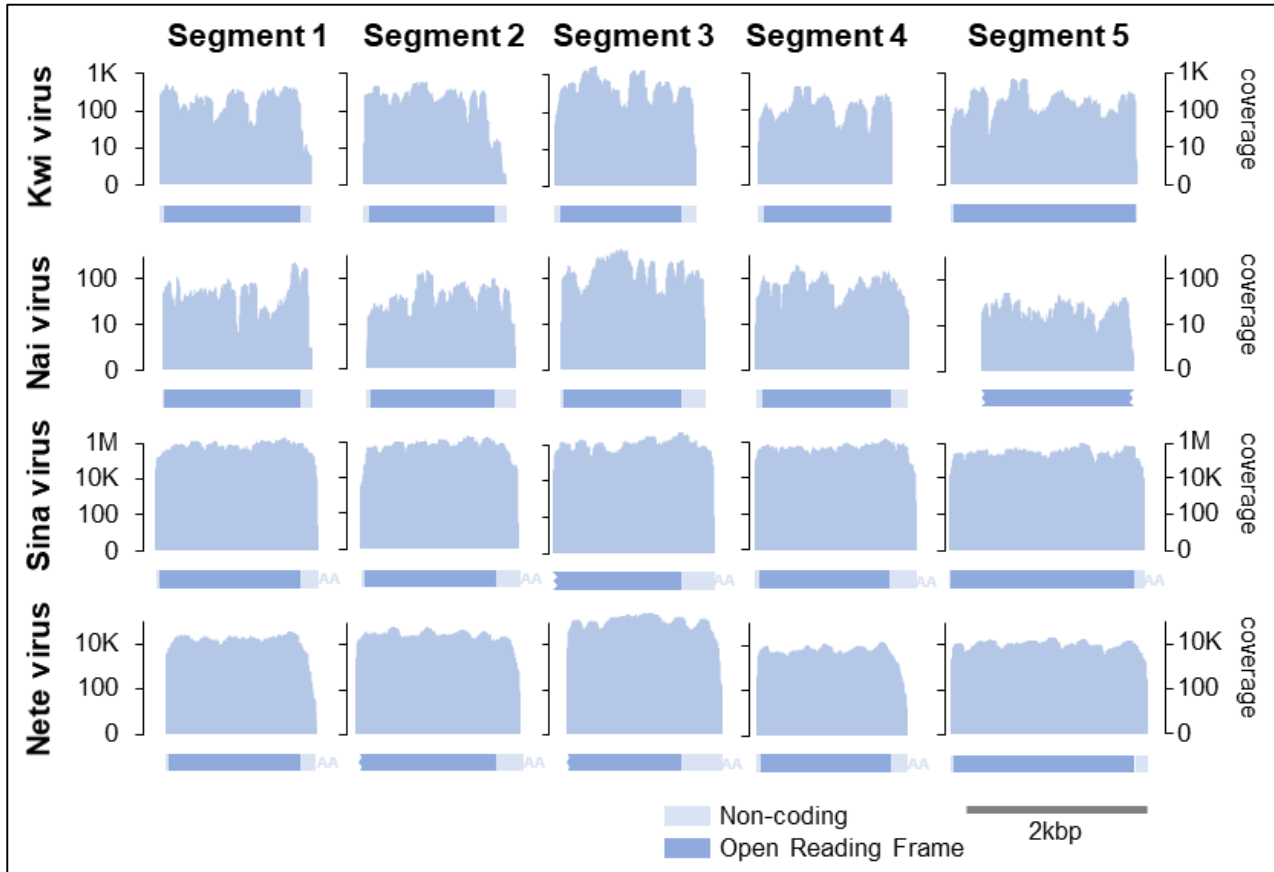

**Figure 2: Phylogenetic trees for each of the viral segments**

Panels A-D show maximum-likelihood phylogenetic trees for segments 1-5, inferred from amino-acid sequences. Trees are mid-point rooted, and the scale bar represents 0.5 substitutions per site. Note that some aspects of tree topology appear to be consistent among segments, suggesting that reassortment may be limited. Sequence alignments and tree files are provided in Supporting File S3

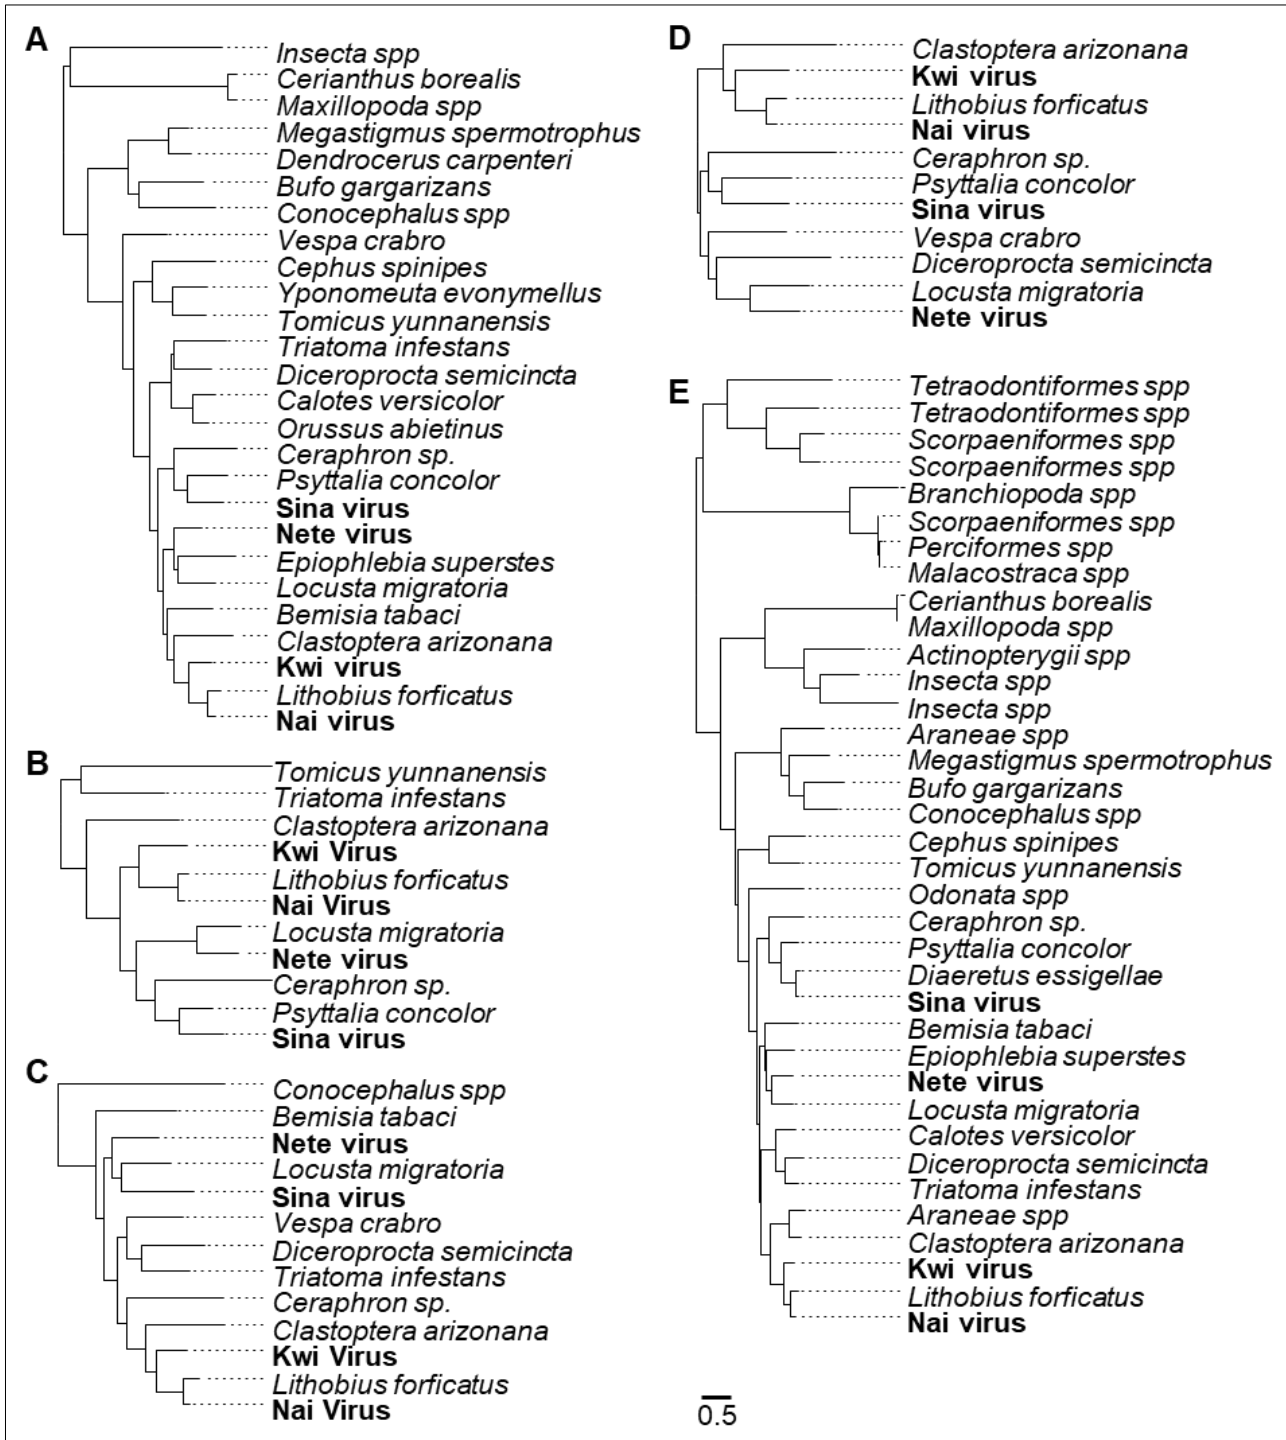

### Figure 3: Relationship of the Quenyaviruses to other RNA viruses

Unrooted phylogenetic trees show the possible relationships between the RdRp of Quenyaviruses and RdRps of representatives from other groups of RNA viruses that were identified as homologous by HHpred. Trees were inferred by maximum-likelihood (A and B) from alignments using Espresso (A) and M-coffee (B), or using a Bayesian approach (C) that co-infers the tree and alignment. None of the deep relationships had any support in the Bayesian analysis. Sequence alignments are provided in Supporting File S3.

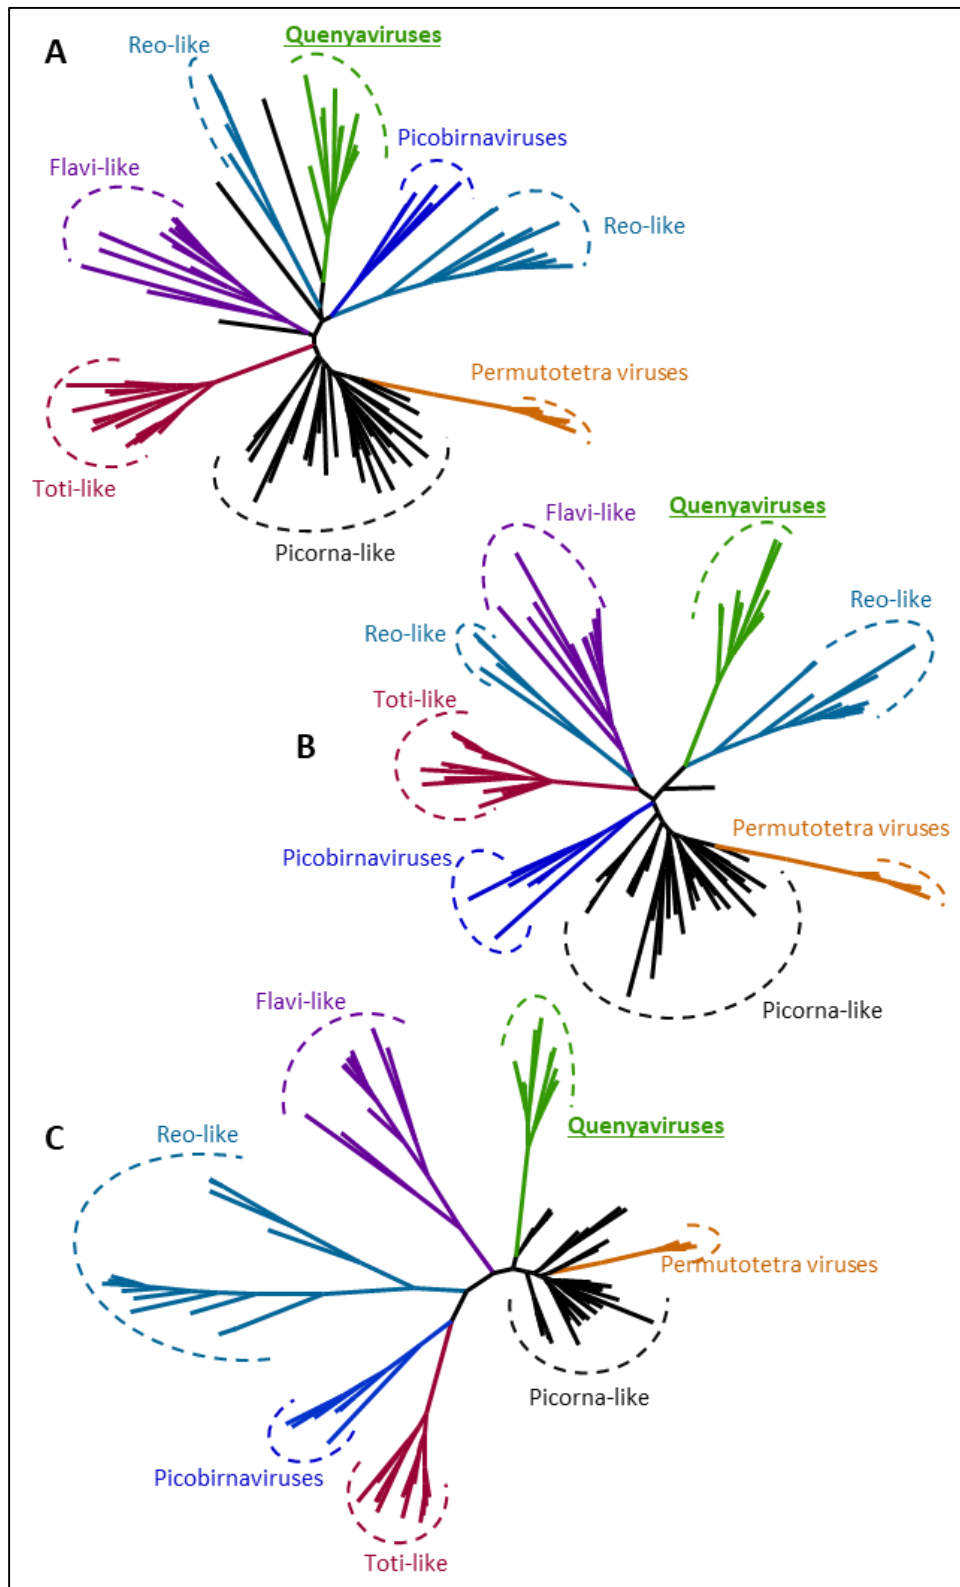

### Supporting Figure S1: 'Dark' virus identification by small-RNA sequencing

Points correspond to the contigs assembled by Webster et al (2015) using Trinity that are sources of substantial numbers of small RNAs, and thus candidates to be viruses (high viRNA:piRNA length ratio) or transposable elements (low viRNA:piRNA ratio). Those marked in black have high blastp-detectable sequence similarity to known viruses, and those marked in colour correspond to segments of Kwi and Nai virus. Many pale grey points in the top-right corner of the plot are the other unconfirmed siRNA 'candidate' viruses reported by Webster et al (2015).

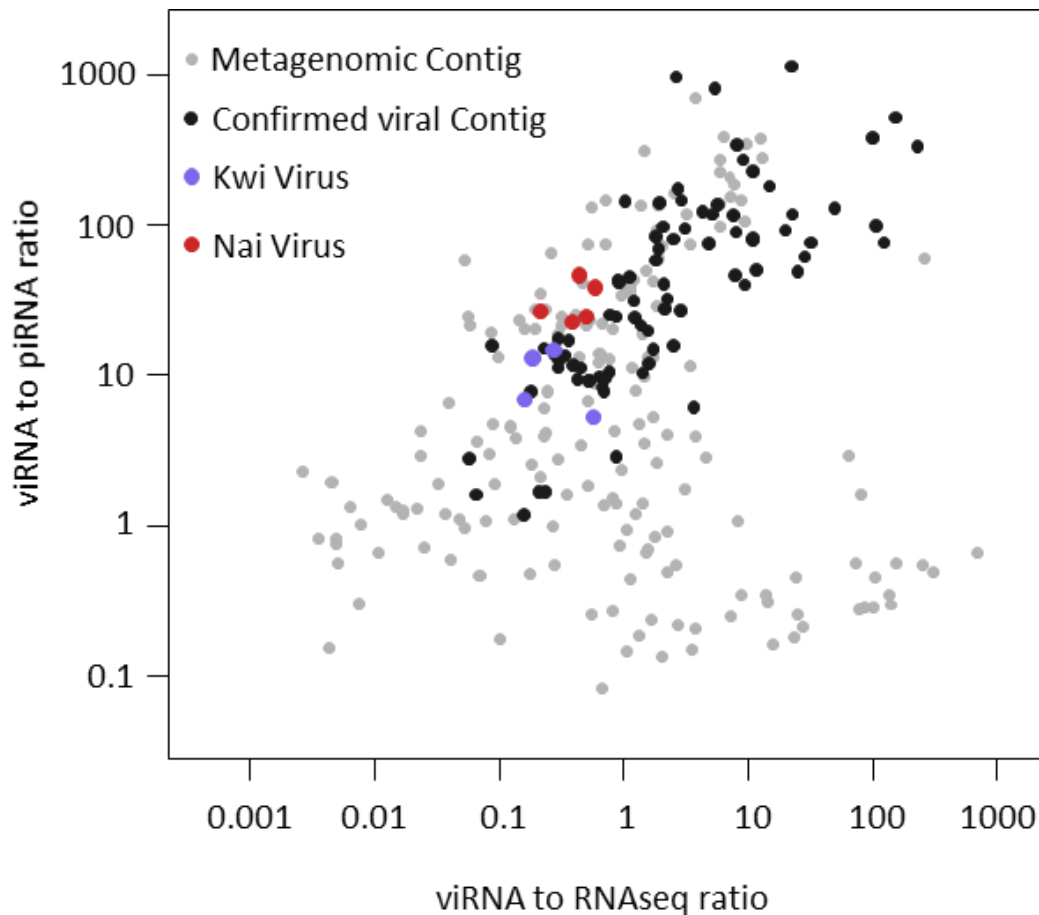

## Supporting Figure S2: Kwi virus small RNA size distribution

The bar plots (left column) show the size distribution of reads mapping to each segment (rows 1-5) of Kwi virus. Bars are coloured according to the 5' base (red U, yellow G, blue C and green A), numbers plotted above the x-axis show read counts mapping to the positive strand, and those below the axis those mapping to the negative strand. Line plots (right column) show the genomic locations and numbers of the 21nt reads deriving from the positive (blue) and negative (red) strands of the virus. Note that siRNA numbers reflect the apparent abundance of each segment in other hosts (Supporting Figure S3).

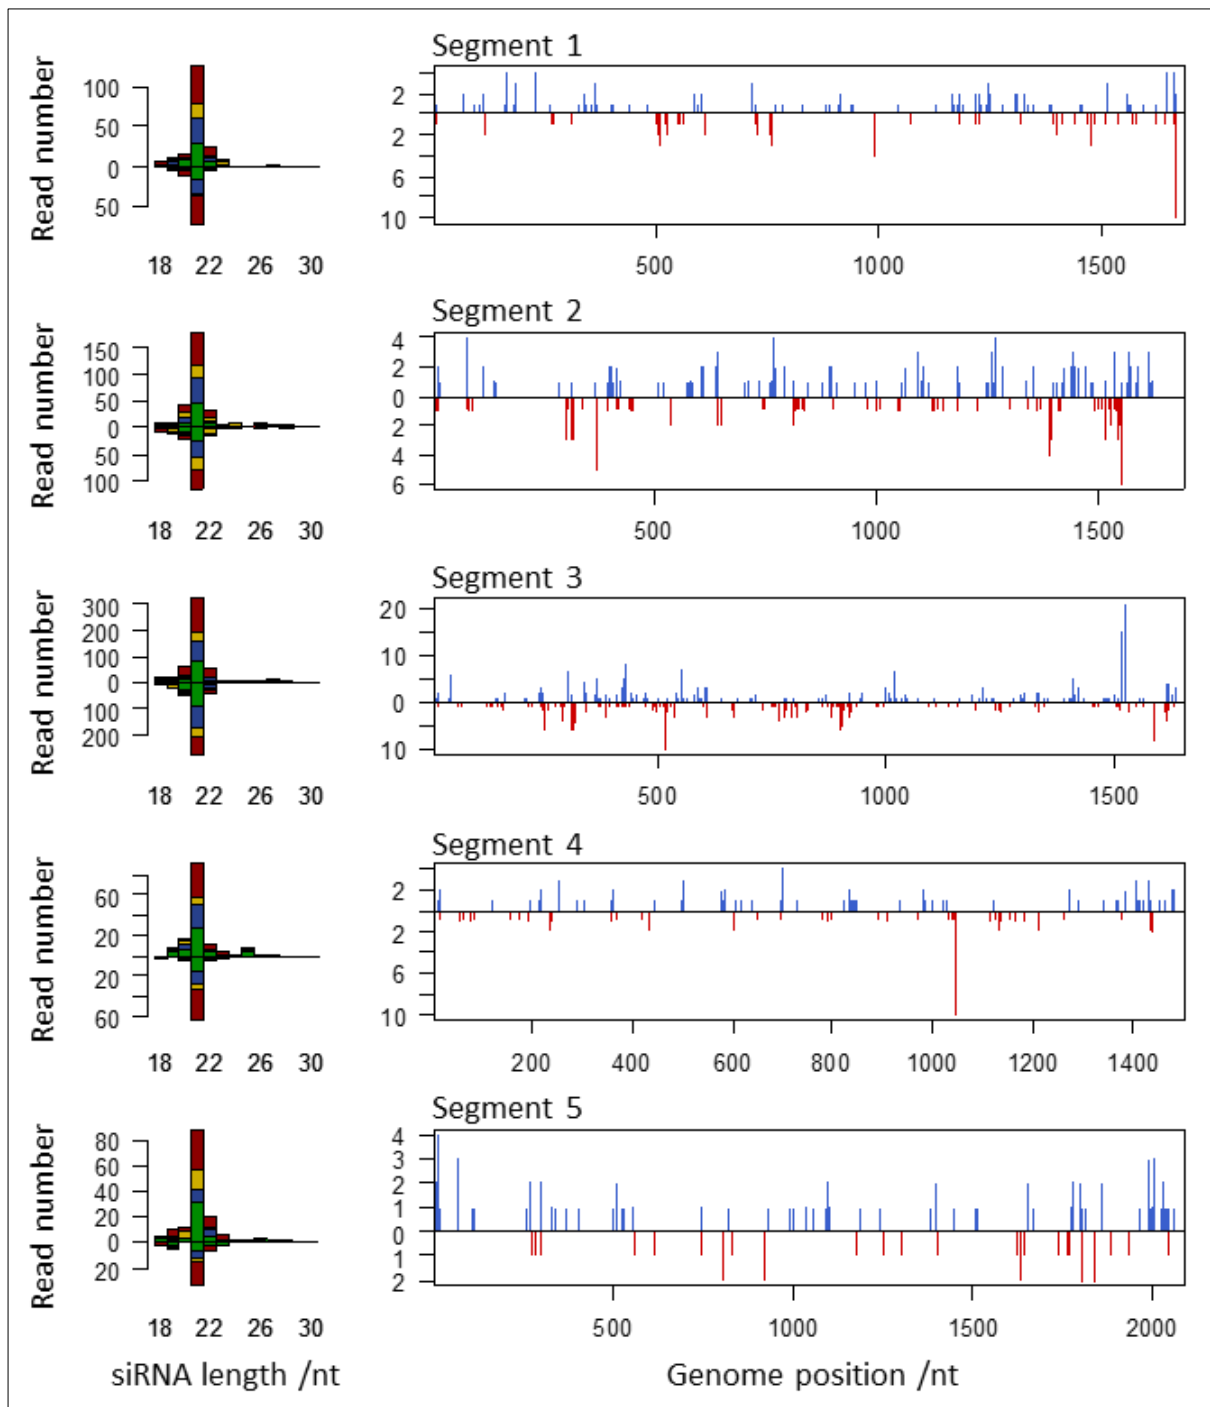



### Supporting Figure S3: Co-occurrence of Sina virus segments across *L. fabarum* samples

Panels show the virus read abundance for each segment (colours) from each of the adult samples (A) and larval samples (B), and the correlation in read abundance between segments across all samples (C) on a scale of virus reads per kilobase per thousand total reads. Note that virus read numbers are highly correlated among segments (Panel C: correlation coefficient >0.87), and that reads from segment 3 are always most abundant while those from segment 5 are always least abundant (panel C). Note that Adult samples 1-3 were from the same experimental cage, as were 4-6.

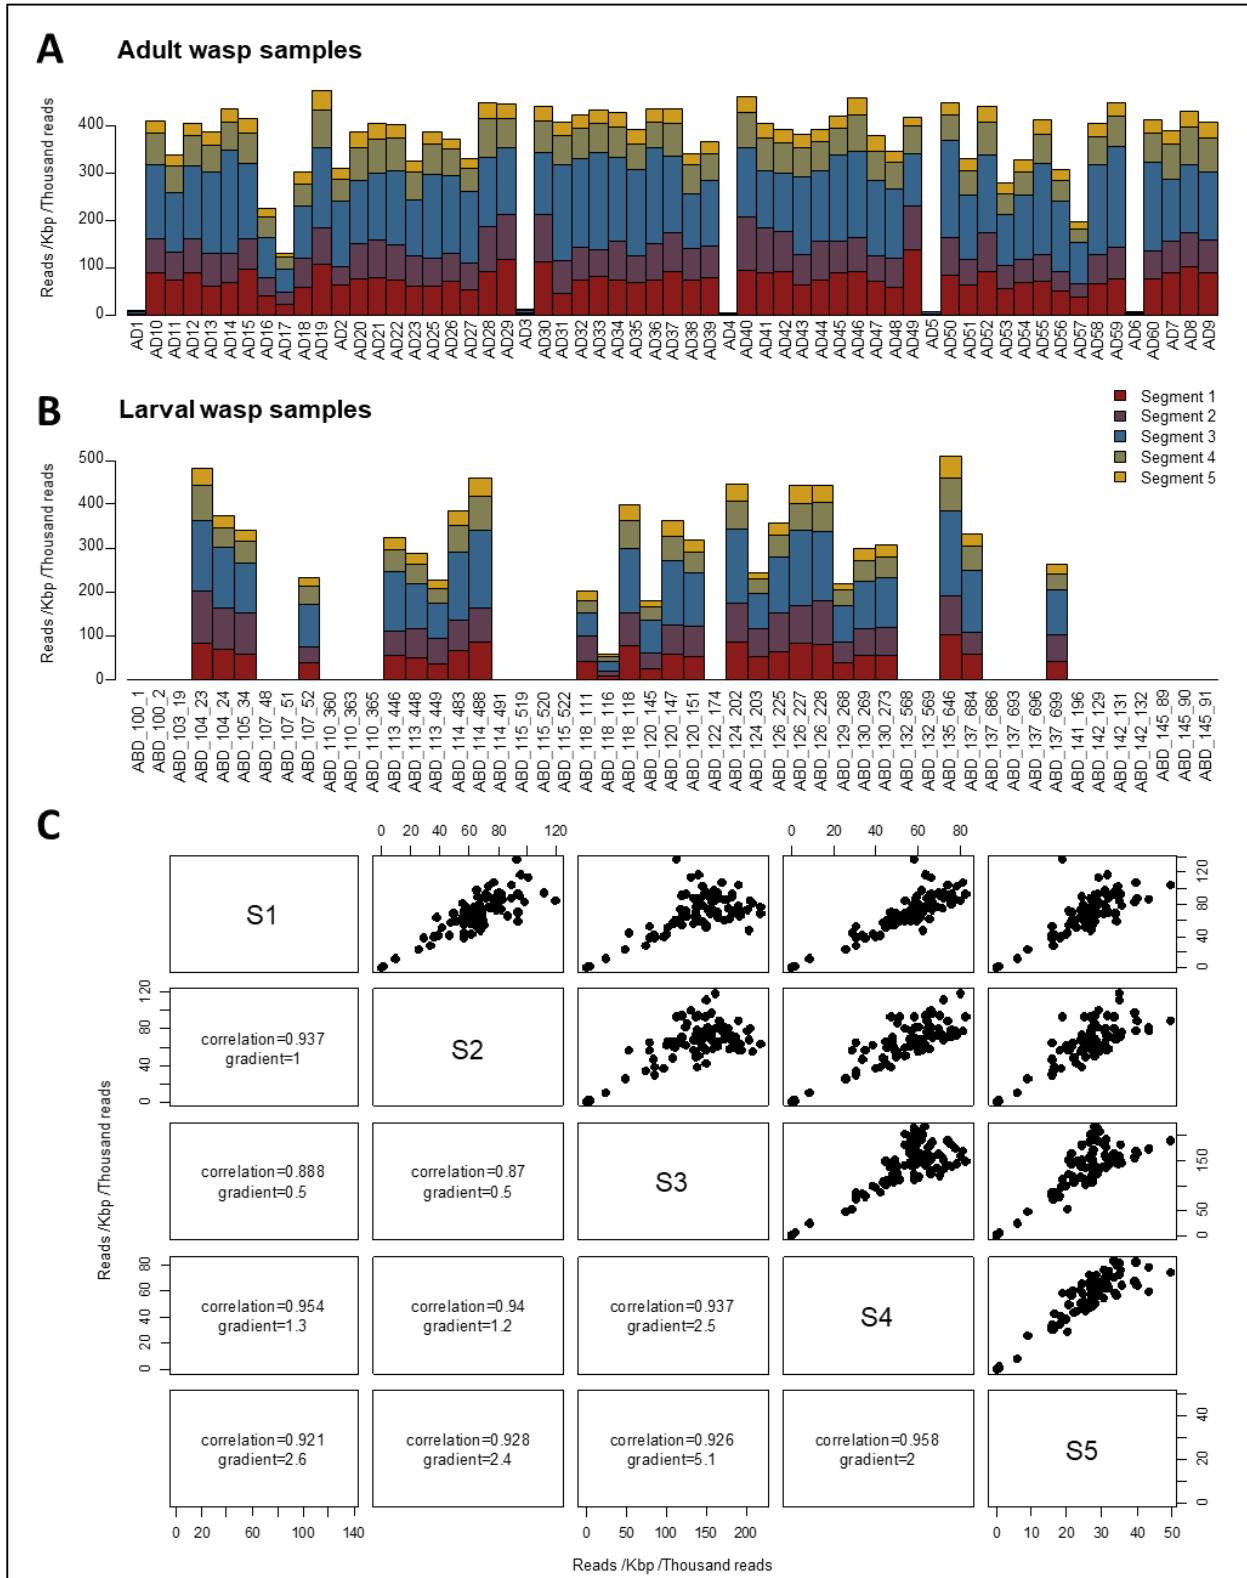

## References

- Aguiar, E., R. P. Olmo, S. Paro, F. V. Ferreira, I. J. D. de Faria, Y. M. H. Tadjro, F. P. Lobo, E. G. Kroon, C. Meignin, D. Gatherer, J. L. Imler and J. T. Marques (2015). "Sequence-independent characterization of viruses based on the pattern of viral small RNAs produced by the host." *Nucleic Acids Research* **43**(13): 6191-6206.
- Armougom, F., S. Moretti, O. Poirot, S. Audic, P. Dumas, B. Schaeli, V. Keduas and C. Notredame (2006). "Expresso: automatic incorporation of structural information in multiple sequence alignments using 3D-Coffee." *Nucleic Acids Research* **34**(suppl\_2): W604-W608.
- Bekal, S., L. L. Domier, T. L. Niblack and K. N. Lambert (2011). "Discovery and initial analysis of novel viral genomes in the soybean cyst nematode." *Journal of General Virology* **92**(8): 1870-1879.
- Bhardwaj, G., K. D. Ko, Y. Hong, Z. Zhang, N. L. Ho, S. V. Chintapalli, L. A. Kline, M. Gotlin, D. N. Hartranft, M. E. Patterson, F. Dave, E. J. Smith, E. C. Holmes, R. L. Patterson and D. B. van Rossum (2012). "PHYRN: A Robust Method for Phylogenetic Analysis of Highly Divergent Sequences." *PLOS ONE* **7**(4): e34261.
- Breitbart, M., P. Salamon, B. Andresen, J. M. Mahaffy, A. M. Segall, D. Mead, F. Azam and F. Rohwer (2002). "Genomic analysis of uncultured marine viral communities." *Proceedings of the National Academy of Sciences* **99**(22): 14250-14255.
- Buchfink, B., C. Xie and D. H. Huson (2014). "Fast and sensitive protein alignment using DIAMOND." *Nature Methods* **12**: 59.
- Camacho, C., G. Coulouris, V. Avagyan, N. Ma, J. Papadopoulos, K. Bealer and T. L. Madden (2009). "BLAST+: architecture and applications." *BMC Bioinformatics* **10**(1): 421.
- Coyle, M. C., C. N. Elya, M. Bronski and M. B. Eisen (2018). "Entomophthovirus: An insect-derived iflavivirus that infects a behavior manipulating fungal pathogen of dipterans." *bioRxiv*: 371526.
- Dennis, A. B., H. Käch and C. Vorburger (In Revision). "Dual RNA-seq in an aphid parasitoid reveals plastic and evolved adaptation."
- Dennis, A. B., V. Patel, K. M. Oliver and C. Vorburger (2017). "Parasitoid gene expression changes after adaptation to symbiont-protected hosts." *Evolution* **71**(11): 2599-2617.
- Di Giallonardo, F., T. E. Schlub, M. Shi and E. C. Holmes (2017). "Dinucleotide Composition in Animal RNA Viruses Is Shaped More by Virus Family than by Host Species." *Journal of Virology* **91**(8): e02381-02316.
- Dolja, V. V. and E. V. Koonin (2018). "Metagenomics reshapes the concepts of RNA virus evolution by revealing extensive horizontal virus transfer." *Virus research* **244**: 36-52.
- Edgar, R. C. (2004). "MUSCLE: multiple sequence alignment with high accuracy and high throughput." *Nucleic Acids Research* **32**(5): 1792-1797.
- Folmer, O., M. Black, W. Hoeh, R. Lutz and R. Vrijenhoek (1994). "DNA primers for amplification of mitochondrial cytochrome c oxidase subunit I from diverse metazoan invertebrates." *Molecular marine biology and biotechnology* **3**(5): 294-299.
- François, S., D. Filloux, M. Frayssinet, P. Roumagnac, D. P. Martin, M. Ogliastro and R. Froissart (2018). "Increase in taxonomic assignment efficiency of viral reads in metagenomic studies." *Virus research* **244**: 230-234.
- François, S., D. Filloux, P. Roumagnac, D. Bigot, P. Gayral, D. P. Martin, R. Froissart and M. Ogliastro (2016). "Discovery of parvovirus-related sequences in an unexpected broad range of animals." *Scientific Reports* **6**: 30880.
- Galbraith, D. A., Z. L. Fuller, A. M. Ray, A. Brockmann, M. Frazier, M. W. Gikungu, J. F. I. Martinez, K. M. Kapheim, J. T. Kerby, S. D. Kocher, O. Losyev, E. Muli, H. M. Patch, C. Rosa, J. M. Sakamoto, S. Stanley, A. D. Vaudo and C. M. Grozinger (2018). "Investigating the viral ecology of global bee communities with high-throughput metagenomics." *Scientific Reports* **8**(1): 8879.
- Geoghegan, J. L., S. Duchêne and E. C. Holmes (2017). "Comparative analysis estimates the relative frequencies of co-divergence and cross-species transmission within viral families." *PLOS Pathogens* **13**(2): e1006215.
- Gilbert, K. B., E. E. Holcomb, R. L. Allscheid and J. C. Carrington (2019). "Hiding in plain sight: New virus genomes discovered via a systematic analysis of fungal public transcriptomes." *PLOS ONE* **14**(7): e0219207.

- Grabherr, M. G., B. J. Haas, M. Yassour, J. Z. Levin, D. A. Thompson, I. Amit, X. Adiconis, L. Fan, R. Raychowdhury, Q. Zeng, Z. Chen, E. Mauceli, N. Hacohen, A. Gnirke, N. Rhind, F. di Palma, B. W. Birren, C. Nusbaum, K. Lindblad-Toh, N. Friedman and A. Regev (2011). "Full-length transcriptome assembly from RNA-Seq data without a reference genome." *Nature Biotechnology* **29**: 644.
- Greninger, A. L. (2018). "A decade of RNA virus metagenomics is (not) enough." *Virus Research* **244**: 218-229.
- Guindon, S., J.-F. Dufayard, V. Lefort, M. Anisimova, W. Hordijk and O. Gascuel (2010). "New Algorithms and Methods to Estimate Maximum-Likelihood Phylogenies: Assessing the Performance of PhyML 3.0." *Systematic Biology* **59**(3): 307-321.
- Habayeb, M. S., S. K. Ekegren and D. Hultmark (2006). "Nora virus, a persistent virus in *Drosophila*, defines a new picorna-like virus family." *Journal of General Virology* **87**(10): 3045-3051.
- Kapoor, A., P. Simmonds, W. I. Lipkin, S. Zaidi and E. Delwart (2010). "Use of nucleotide composition analysis to infer hosts for three novel picorna-like viruses." *Journal of virology* **84**(19): 10322-10328.
- King, A. M. Q., E. J. Lefkowitz, A. R. Mushegian, M. J. Adams, B. E. Dutilh, A. E. Gorbalenya, B. Harrach, R. L. Harrison, S. Junglen, N. J. Knowles, A. M. Kropinski, M. Krupovic, J. H. Kuhn, M. L. Nibert, L. Rubino, S. Sabanadzovic, H. Sanfaçon, S. G. Siddell, P. Simmonds, A. Varsani, F. M. Zerbini and A. J. Davison (2018). "Changes to taxonomy and the International Code of Virus Classification and Nomenclature ratified by the International Committee on Taxonomy of Viruses (2018)." *Archives of Virology*.
- Knox, M. A., K. R. Gedye and D. T. S. Hayman (2018). "The Challenges of Analysing Highly Diverse Picobirnavirus Sequence Data." *Viruses* **10**(12): 685.
- Koonin, E. V., V. V. Dolja and M. Krupovic (2015). "Origins and evolution of viruses of eukaryotes: The ultimate modularity." *Virology* **479-480**: 2-25.
- Krishnamurthy, S. R. and D. Wang (2017). "Origins and challenges of viral dark matter." *Virus research* **239**: 136-142.
- Kuchibhatla, D. B., W. A. Sherman, B. Y. W. Chung, S. Cook, G. Schneider, B. Eisenhaber and D. G. Karlin (2014). "Powerful Sequence Similarity Search Methods and In-Depth Manual Analyses Can Identify Remote Homologs in Many Apparently "Orphan" Viral Proteins." *Journal of Virology* **88**(1): 10-20.
- Langmead, B. and S. L. Salzberg (2012). "Fast gapped-read alignment with Bowtie 2." *Nature Methods* **9**: 357.
- Le, S. Q. and O. Gascuel (2008). "An Improved General Amino Acid Replacement Matrix." *Molecular Biology and Evolution* **25**(7): 1307-1320.
- Li, C. X., M. Shi, J. H. Tian, X. D. Lin, Y. J. Kang, L. J. Chen, X. C. Qin, J. G. Xu, E. C. Holmes and Y. Z. Zhang (2015). "Unprecedented genomic diversity of RNA viruses in arthropods reveals the ancestry of negative-sense RNA viruses." *Elife* **4**.
- Longdon, B., G. G. R. Murray, W. J. Palmer, J. P. Day, D. J. Parker, J. J. Welch, D. J. Obbard and F. M. Jiggins (2015). "The evolution, diversity, and host associations of rhabdoviruses." *Virus Evolution* **1**(1): 12.
- Medd, N. C., S. Fellous, F. M. Waldron, A. Xuéreb, M. Nakai, J. V. Cross and D. J. Obbard (2018). "The virome of *Drosophila suzukii*, an invasive pest of soft fruit." *Virus Evolution* **4**(1): vey009-vey009.
- Mushegian, A., A. Shipunov and S. F. Elena (2016). "Changes in the composition of the RNA virome mark evolutionary transitions in green plants." *BMC Biology* **14**(1): 68.
- Nute, M., E. Saleh and T. Warnow (2018). "Evaluating Statistical Multiple Sequence Alignment in Comparison to Other Alignment Methods on Protein Data Sets." *Systematic Biology* **68**(3): 396-411.
- Obbard, D. J. (2018). "Expansion of the Metazoan Virosphere: Progress, Pitfalls, and Prospects. ." *Current Opinion in Virology* **31**: 17-23.
- Peters, R. S., L. Krogmann, C. Mayer, A. Donath, S. Gunkel, K. Meusemann, A. Kozlov, L. Podsiadlowski, M. Petersen, R. Lanfear, P. A. Diez, J. Heraty, K. M. Kjer, S. Klopstein, R. Meier, C. Polidori, T. Schmitt, S. Liu, X. Zhou, T. Wappler, J. Rust, B. Misof and O. Niehuis (2017). "Evolutionary History of the Hymenoptera." *Current Biology* **27**(7): 1013-1018.
- Redelings, B. (2014). "Erasing Errors due to Alignment Ambiguity When Estimating Positive Selection." *Molecular Biology and Evolution* **31**(8): 1979-1993.
- Rehm, P., K. Meusemann, J. Borner, B. Misof and T. Burmester (2014). "Phylogenetic position of Myriapoda revealed by 454 transcriptome sequencing." *Molecular Phylogenetics and Evolution* **77**: 25-33.
- Rinke, C., P. Schwientek, A. Sczyrba, N. N. Ivanova, I. J. Anderson, J.-F. Cheng, A. Darling, S. Malfatti, B. K. Swan, E. A. Gies, J. A. Dodsworth, B. P. Hedlund, G. Tsiamis, S. M. Sievert, W.-T. Liu, J. A. Eisen, S. J.

- Hallam, N. C. Kyrpides, R. Stepanauskas, E. M. Rubin, P. Hugenholtz and T. Woyke (2013). "Insights into the phylogeny and coding potential of microbial dark matter." *Nature* **499**: 431.
- Roberts, A. and L. Pachter (2012). "Streaming fragment assignment for real-time analysis of sequencing experiments." *Nature Methods* **10**: 71.
- Shi, M., X. D. Lin, X. Chen, J. H. Tian, L. J. Chen, K. Li, W. Wang, J. S. Eden, J. J. Shen, L. Liu, E. C. Holmes and Y. Z. Zhang (2018). "The evolutionary history of vertebrate RNA viruses." *Nature* **556**(7700): 197-+.
- Shi, M., X. D. Lin, J. H. Tian, L. J. Chen, X. Chen, C. X. Li, X. C. Qin, J. Li, J. P. Cao, J. S. Eden, J. Buchmann, W. Wang, J. G. Xu, E. C. Holmes and Y. Z. Zhang (2016). "Redefining the invertebrate RNA virosphere." *Nature* **540**(7634): 539-+.
- Shi, M., X. D. Lin, N. Vasilakis, J. H. Tian, C. X. Li, L. J. Chen, G. Eastwood, X. N. Diao, M. H. Chen, X. Chen, X. C. Qin, S. G. Widen, T. G. Wood, R. B. Tesh, J. G. Xu, E. C. Holmes and Y. Z. Zhang (2016). "Divergent Viruses Discovered in Arthropods and Vertebrates Revise the Evolutionary History of the Flaviviridae and Related Viruses." *Journal of Virology* **90**(2): 659-669.
- Shi, M., V. L. White, T. Schlub, J.-S. Eden, A. A. Hoffmann and E. C. Holmes (2018). "No detectable effect of Wolbachia wMel on the prevalence and abundance of the RNA virome of *Drosophila melanogaster*." *Proceedings of the Royal Society B-Biological Sciences* **In Press**.
- Shi, M., Y. Z. Zhang and E. C. Holmes (2018). "Meta-transcriptomics and the evolutionary biology of RNA viruses." *Virus Research* **243**: 83-90.
- Simmonds, P., M. J. Adams, M. Benkő, M. Breitbart, J. R. Brister, E. B. Carstens, A. J. Davison, E. Delwart, A. E. Gorbalenya, B. Harrach, R. Hull, A. M. Q. King, E. V. Koonin, M. Krupovic, J. H. Kuhn, E. J. Lefkowitz, M. L. Nibert, R. Orton, M. J. Roossinck, S. Sabanadzovic, M. B. Sullivan, C. A. Suttle, R. B. Tesh, R. A. van der Vlugt, A. Varsani and F. M. Zerbini (2017). "Virus taxonomy in the age of metagenomics." *Nature Reviews Microbiology* **15**: 161.
- Simmonds, P. and P. Aiewsakun (2018). "Virus classification – where do you draw the line?" *Archives of Virology* **163**(8): 2037-2046.
- Tan, G., M. Muffato, C. Ledergerber, J. Herrero, N. Goldman, M. Gil and C. Dessimoz (2015). "Current Methods for Automated Filtering of Multiple Sequence Alignments Frequently Worsen Single-Gene Phylogenetic Inference." *Systematic Biology* **64**(5): 778-791.
- Tassone, E. E., C. C. Cowden and S. J. Castle (2017). "De novo transcriptome assemblies of four xylem sap-feeding insects." *GigaScience* **6**(3).
- Traverso, L., A. Lavore, I. Sierra, V. Palacio, J. Martinez-Barnette, J. M. Latorre-Estivalis, G. Mougabure-Cueto, F. Francini, M. G. Lorenzo, M. H. Rodríguez, S. Ons and R. V. Rivera-Pomar (2017). "Comparative and functional triatomine genomics reveals reductions and expansions in insecticide resistance-related gene families." *PLOS Neglected Tropical Diseases* **11**(2): e0005313.
- Waldron, F. M., G. N. Stone and D. J. Obbard (2018). "Metagenomic sequencing suggests a diversity of RNA interference-like responses to viruses across multicellular eukaryotes." *PLOS Genetics* **14**(7): e1007533.
- Wallace, I. M., O. O'Sullivan, D. G. Higgins and C. Notredame (2006). "M-Coffee: combining multiple sequence alignment methods with T-Coffee." *Nucleic Acids Research* **34**(6): 1692-1699.
- Webster, C. L., B. Longdon, S. H. Lewis and D. J. Obbard (2016). "Twenty-Five New Viruses Associated with the Drosophilidae (Diptera)." *Evolutionary Bioinformatics* **12**(12): 13-25.
- Webster, C. L., F. M. Waldron, S. Robertson, D. Crowson, G. Ferrari, J. F. Quintana, J. M. Brouqui, E. H. Bayne, B. Longdon, A. H. Buck, B. P. Lazzaro, J. Akorli, P. R. Hadrill and D. J. Obbard (2015). "The Discovery, Distribution, and Evolution of Viruses Associated with *Drosophila melanogaster*." *Plos Biology* **13**(7): 33.
- Wickmark, L. (2019). "Parf Edhellen: The collaborative dictionary dedicated to Tolkien's languages." Retrieved 15/07/2019, 2019, from <http://www.elfdict.com>.
- Yutin, N., D. Bäckström, T. J. G. Ettema, M. Krupovic and E. V. Koonin (2018). "Vast diversity of prokaryotic virus genomes encoding double jelly-roll major capsid proteins uncovered by genomic and metagenomic sequence analysis." *Virology Journal* **15**(1): 67.
- Zhang, W., J. Chen, N. O. Keyhani, Z. Zhang, S. Li and Y. Xia (2015). "Comparative transcriptomic analysis of immune responses of the migratory locust, *Locusta migratoria*, to challenge by the fungal insect pathogen, *Metarhizium acridum*." *BMC Genomics* **16**(1): 867.

- Zhang, Y. Z., M. Shi and E. C. Holmes (2018). "Using Metagenomics to Characterize an Expanding Virosphere." *Cell* **172**(6): 1168-1172.
- Zimmermann, L., A. Stephens, S.-Z. Nam, D. Rau, J. Kübler, M. Lozajic, F. Gabler, J. Söding, A. N. Lupas and V. Alva (2018). "A Completely Reimplemented MPI Bioinformatics Toolkit with a New HHpred Server at its Core." *Journal of Molecular Biology* **430**(15): 2237-2243.

## Supporting Data

### Supporting File S1: Virus details

Excel table providing host species, NCBI project accessions, NCBI Samples, Read abundance and sequence accessions

### Supporting File S2: Strand bias in the sequencing reads from Lepidoptera

Excel table giving the number of positive and negative sense forward-reads for each segment of Nete virus, with comparison ratios for high abundance viruses reported in Waldron et al (2018) and Medd et al (2018)

### Supporting File S3: Phylogenetic Analyses

Compressed text files containing the alignments and tree files for Figures 2 and 3

### Supporting File S4: Raw HHpred output

Compressed text files containing the raw output from the HHpred analysis
